# Supplementary material
Source: MDPI journal article supplement (https://www.mdpi.com/2673-6209/2/2/11)
Supplement: s1 [file s1]

# Influence of Ethylene-1-Alkene Copolymers Microstructure on Thermo-Rheological Behavior of Model Blends for Enhanced Recycling

Girish Galgali\*, Senthil Kumar Kaliappan\* and Tej Pandit

**Citation:** Galgali, G.; Kaliappan, S. K.; Pandit, T. Influence of Ethylene-1-Alkene Copolymers Microstructure on Thermo-Rheological Behavior of Model Blends for Enhanced Recycling. *Macromol* 2022, 2, Firstpage–Lastpage. <https://doi.org/10.3390/xxxxx>

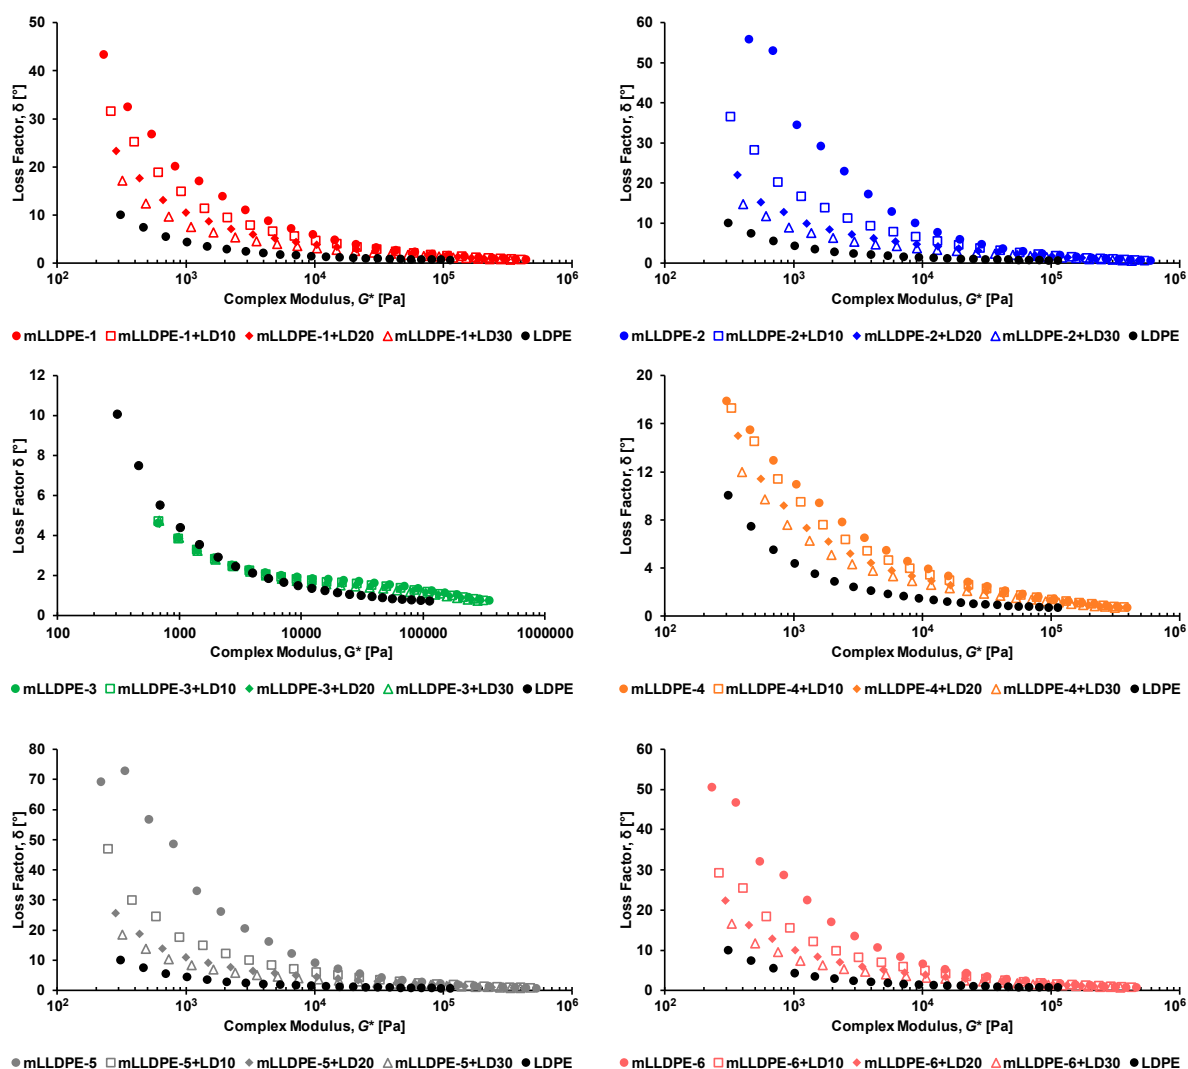

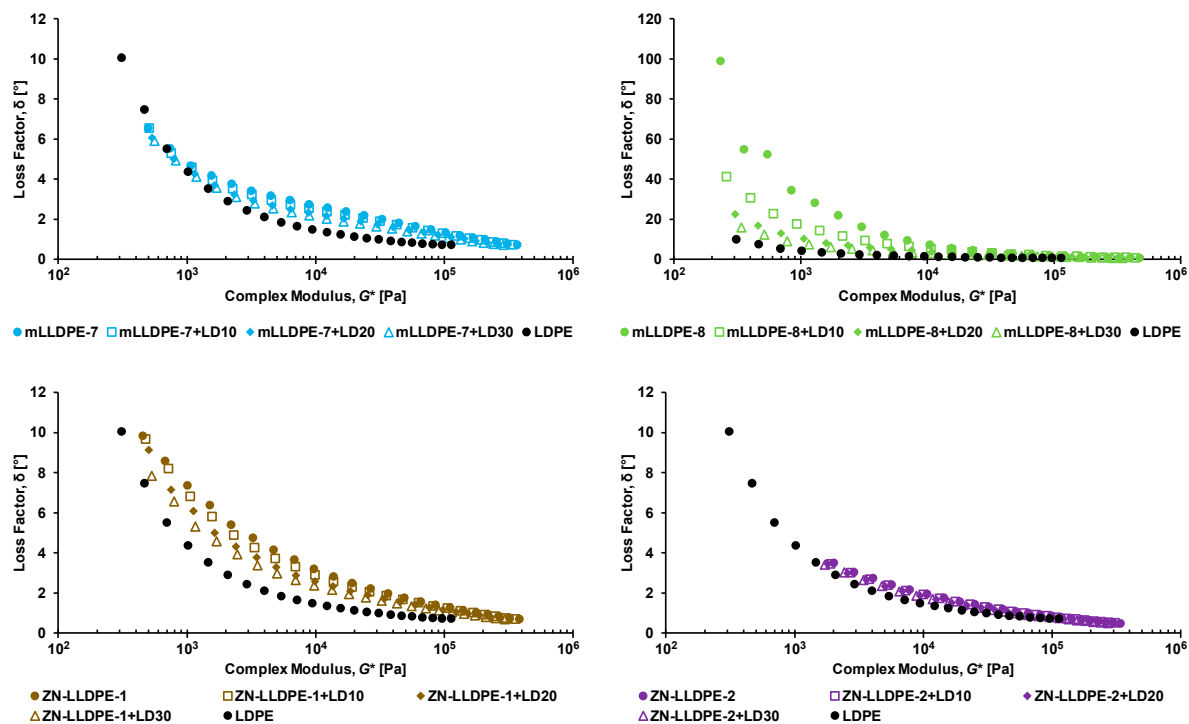

**Figure S1.** Van Gurp-Palmen plots of loss factor  $\delta$  vs complex shear modulus  $G^*$  of all samples obtained from frequency sweep tests.

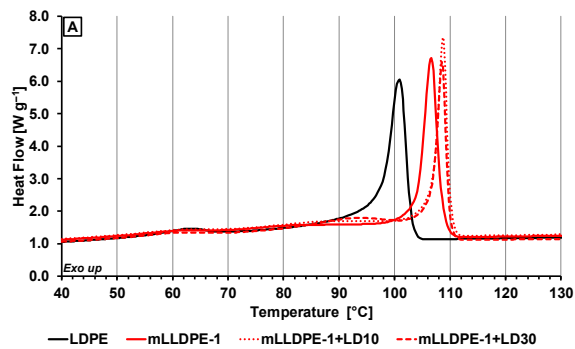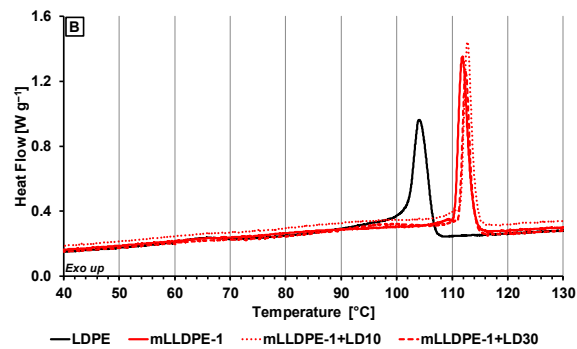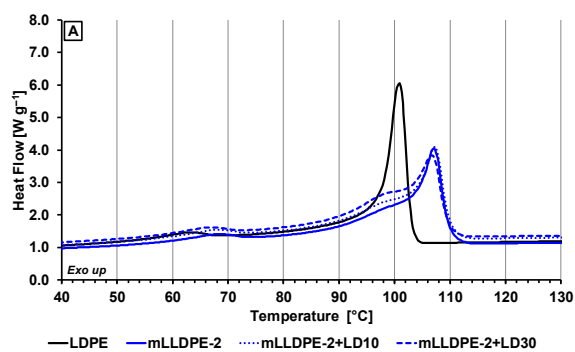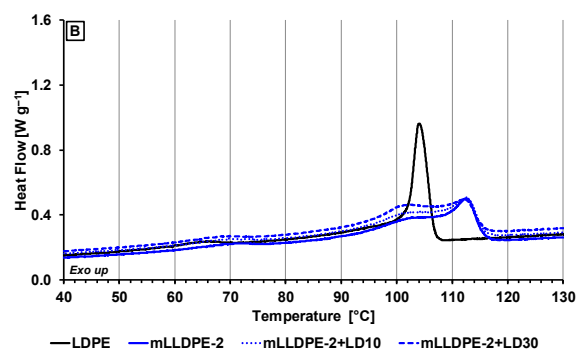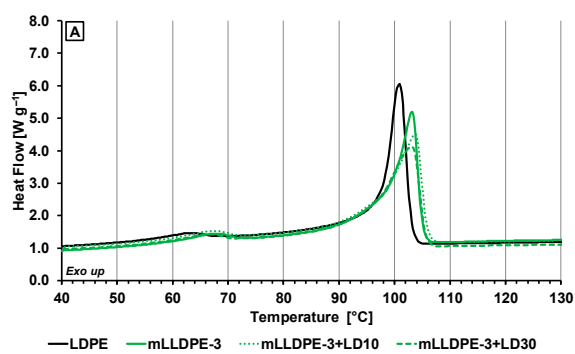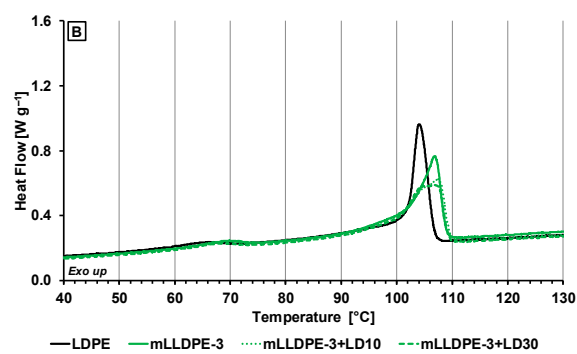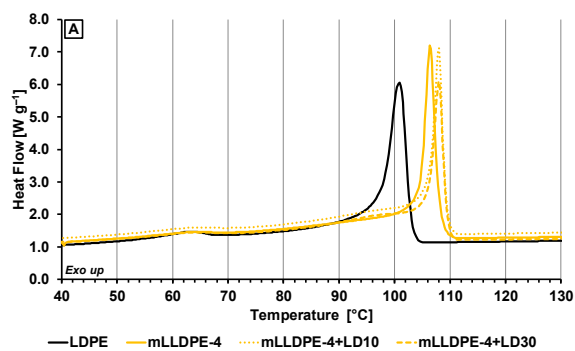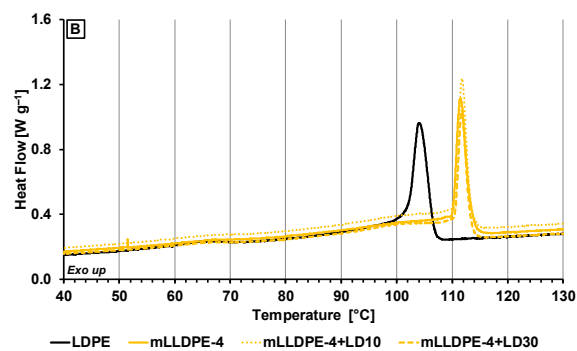

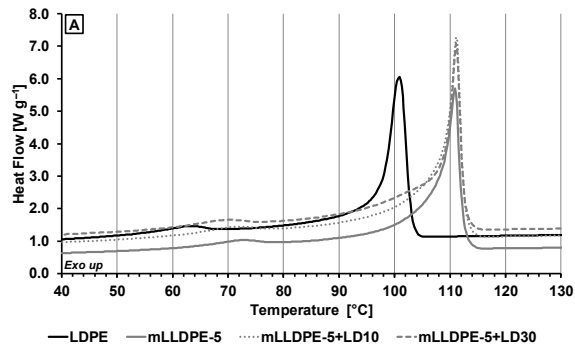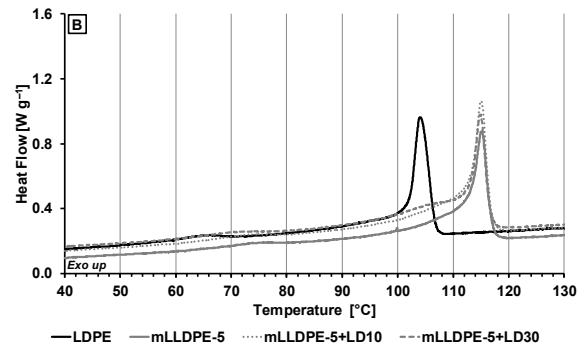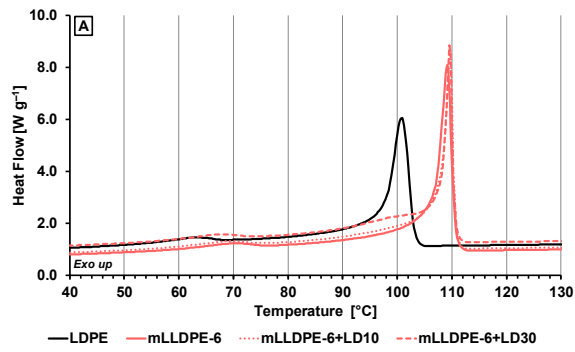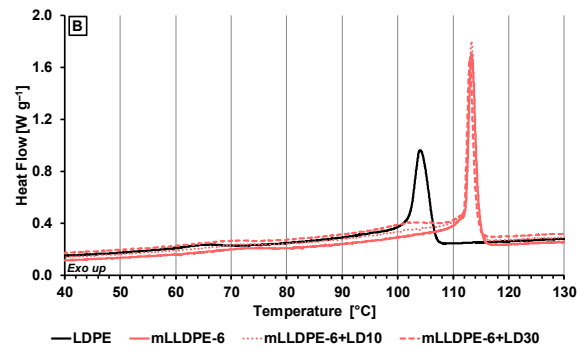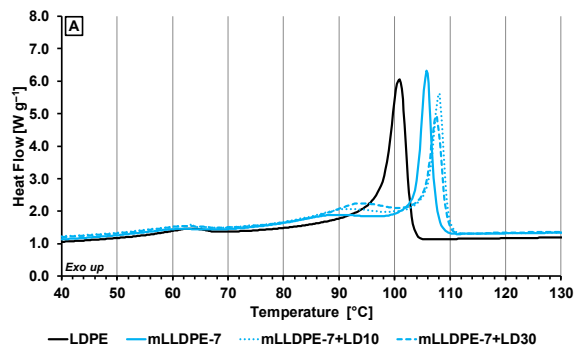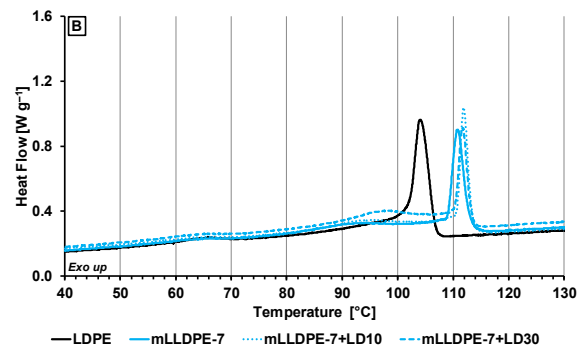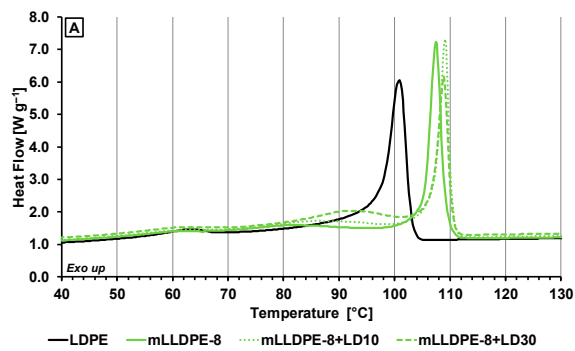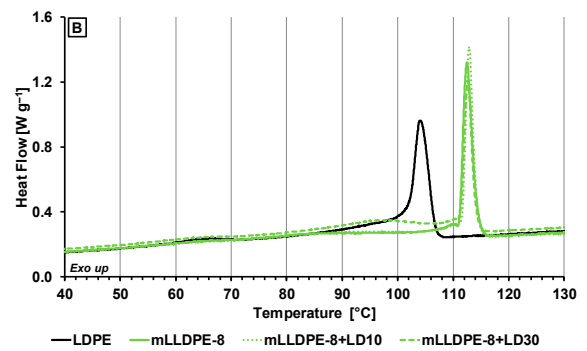

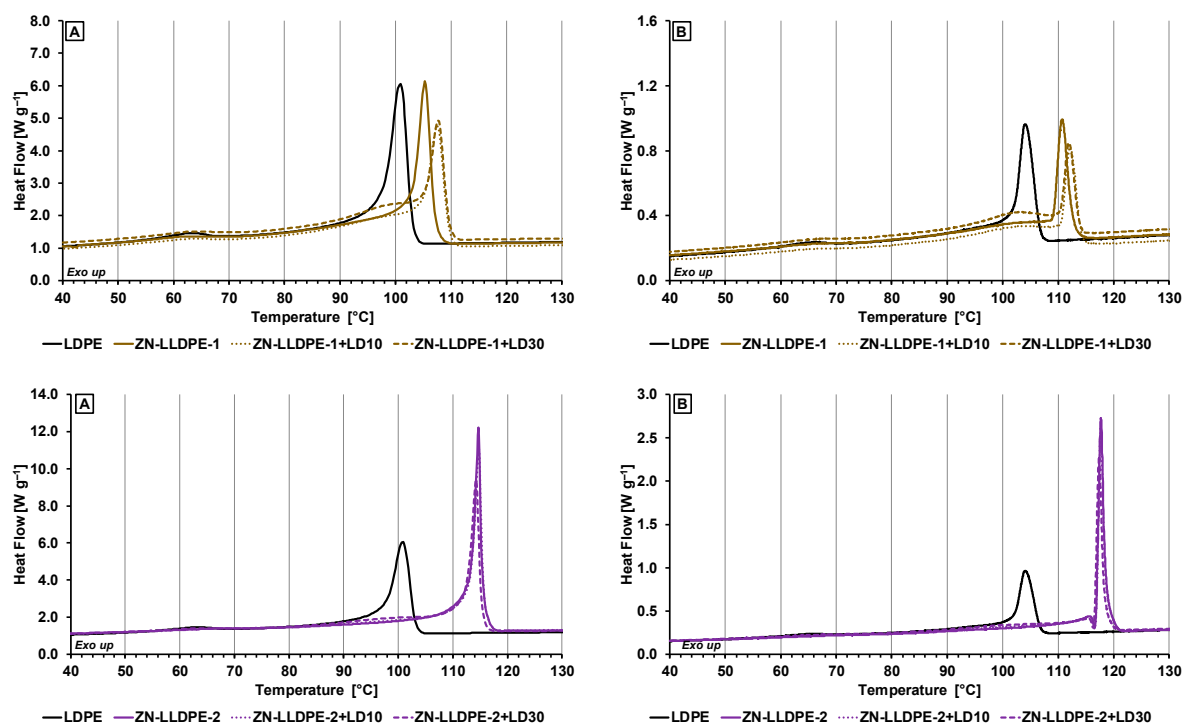

**Figure S2.** DSC heat flow curves as a function of temperature of pristine LDPE, pristine LLDPE and their blends containing 10 and 30 wt.% LDPE measured at (A) an average cooling rate of 20 °C min<sup>-1</sup> and (B) an average cooling rate of 2.5 °C min<sup>-1</sup>.

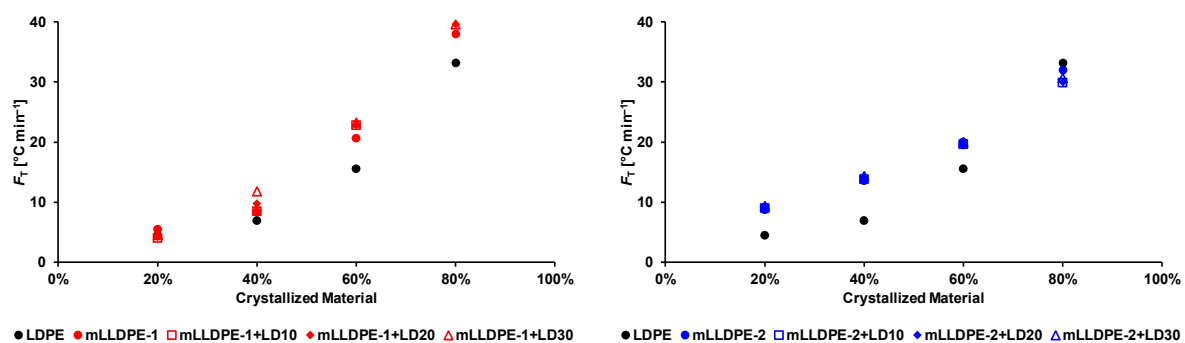

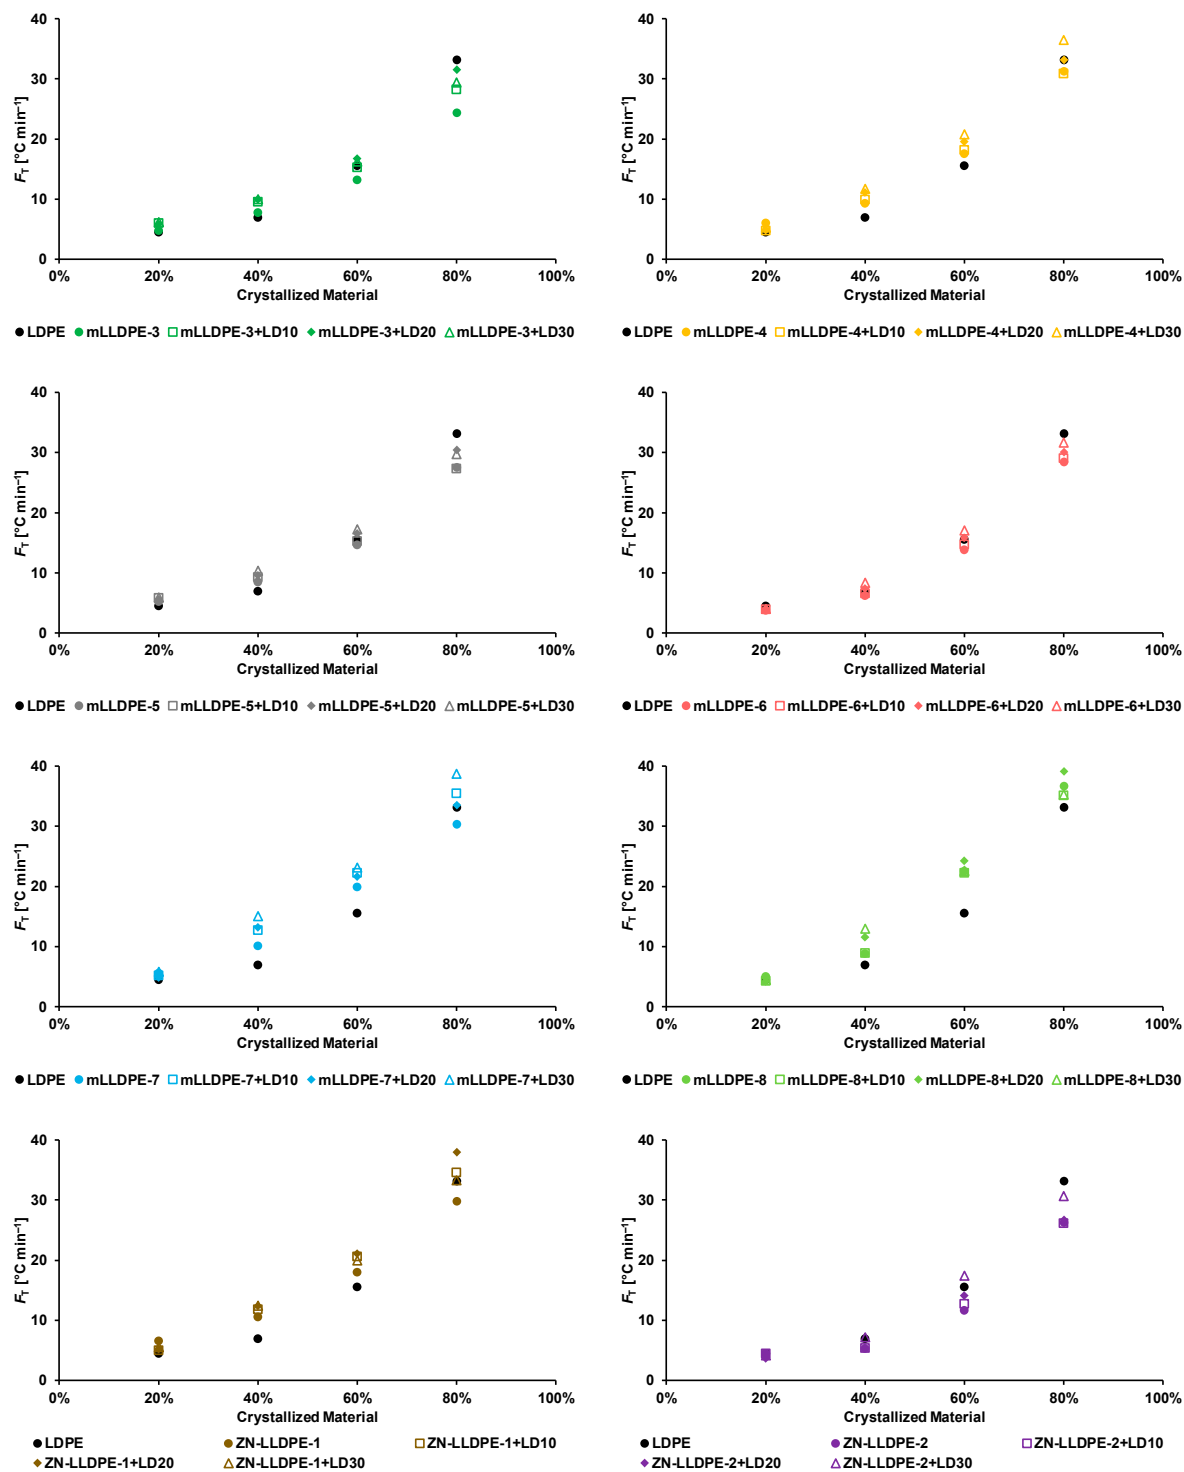

**Figure S3.** Parameter  $F_T$  as a function of the degree of crystallinity for pristine LLDPE, LDPE and their respective LD blends.
